# Supplementary material
Source: PubMed Central journal article supplement (PMC2916593)
Supplement: supp_48_8_2821__1.pdf [file supp_48_8_2821__1.pdf]

|            |        |                                               |        |                                                                                               |
|------------|--------|-----------------------------------------------|--------|-----------------------------------------------------------------------------------------------|
| Chromosome | 226778 | G G G G G G T G G G G G T G G G G             |        |                                                                                               |
| Chromosome | 230811 | C C C C C C C C C C C C C C C C C C C C       |        |                                                                                               |
| Chromosome | 231058 | A A A A A A A A G G A A A A G G A A A A       |        | GBAA0244 major facilitator family transporter                                                 |
| Chromosome | 233823 | A A A A A A A A A A A A G A A A A A A A A A   | murF   | GBAA0244 major facilitator family transporter                                                 |
| Chromosome | 236286 | A A A A A A A A A A A A A A A A A A A A A A   |        | GBAA0246 UDP-N-acetylmuramoylalanine-D-glutamate-2,6-diaminopimelate-D-alanyl-L-alanyl ligase |
| Chromosome | 236311 | T T T T T T T T T T T T T T T T T T T T       |        | GBAA0247 DEAD-box ATP dependent DNA helicase                                                  |
| Chromosome | 236522 | C C C C C C C C C C C C C C C C C C C C C C   | UvsE   | GBAA0248 DEAD-box ATP dependent DNA helicase                                                  |
| Chromosome | 237471 | T T T T G G G T T T T T T T T T T T T T T     |        | GBAA0248 putative UV damage endonuclease                                                      |
| Chromosome | 237521 | C C C C C C C C C C C C C C C C C C C C C C   |        | GBAA0249 rhomboid family protein                                                              |
| Chromosome | 240050 | T T C T T T T T T T T T T T T T T T T T T     | dai-1  | GBAA0249 rhomboid family protein                                                              |
| Chromosome | 241548 | T T T T T T T T T T T T C T T T T T T T T T   |        | GBAA0252 alanine racemase                                                                     |
| Chromosome | 243353 | G G G G G G G G G G G G G G G G G G G G G G   |        | GBAA0254 FemK family transcriptional regulator                                                |
| Chromosome | 243867 | C C C T T T T T T T T T T C T T T T T T T T T |        | GBAA0255 s1 RNA-binding domain-containing protein                                             |
| Chromosome | 244369 | A A A A A A A A G G A A A A A A G A A A A A   |        | GBAA0255 s1 RNA-binding domain-containing protein                                             |
| Chromosome | 253069 | C C C C C C C C C C C C C C C C C C C C C C   | gdp    | GBAA0261 O-sialoglycoprotein endopeptidase                                                    |
| Chromosome | 254568 | C C C C C C C C C C C C C C C C C C C C C C   |        | GBAA0262 ABC transporter ATP-binding protein                                                  |
| Chromosome | 256572 | C C C C C C C C C T T C C C C C C C C C C C C |        | GBAA0263 redox-sensing transcriptional repressor Rex                                          |
| Chromosome | 257099 | A A A A A A A A G A A A A A A A G A A A A A   |        | GBAA0263 redox-sensing transcriptional repressor Rex                                          |
| Chromosome | 259542 | C C C C C C T C C C C C C C C C C C C C C C C | groEL  | GBAA0267 chaperonin GroEL                                                                     |
| Chromosome | 259567 | A A A A A A A A G A A A A A A A G A A A A A   | groEL  | GBAA0267 chaperonin GroEL                                                                     |
| Chromosome | 259569 | T T T T T T A T T T T T T T T T T T T T T T   | groEL  | GBAA0267 chaperonin GroEL                                                                     |
| Chromosome | 332628 | C C C C C C C C C C C C C C C C C C C C C C   | gabT   | GBAA0325 4-aminobutyrate aminotransferase                                                     |
| Chromosome | 332804 | T T T T T T T T T T T T C T T T T T T T T T   | gabT   | GBAA0325 4-aminobutyrate aminotransferase                                                     |
| Chromosome | 333553 | A A A A G A A A A A A A A A A A A A A A A A   | gabT   | GBAA0325 4-aminobutyrate aminotransferase                                                     |
| Chromosome | 337241 | T T C C C C C C C C C C C C C C C C C C C C   | ampS   | GBAA0329 aminopeptidase AmpS                                                                  |
| Chromosome | 346846 | C C C C C C C C C C C C C C C C C C C C C C   |        | GBAA0337 hypothetical protein                                                                 |
| Chromosome | 346847 | G G G G G G G G G G G G G G G G G G G G G G   |        | GBAA0337 hypothetical protein                                                                 |
| Chromosome | 350432 | C C C C C C C C C C C C C C C C C C C C C C   |        | GBAA0340 transcriptional regulator domain-containing protein                                  |
| Chromosome | 351960 | T T T T T T T T T T T T C T T T T T T T T T   | rhaC-1 | GBAA0341 Na <sup>+</sup> /H <sup>+</sup> antiporter NhaC                                      |
| Chromosome | 352432 | A A A A A A A A G A A A A A A A G A A A A A   |        |                                                                                               |
| Chromosome | 356626 | T T T T T T T T T T T T T T T T T T T T A T   |        |                                                                                               |
| Chromosome | 359536 | G G A A A A A A A A A A A A G A A A A A A A   | lucA   | GBAA0348 L-fucose phosphate aldolase                                                          |
| Chromosome | 360092 | A A A A A A A A A A A A G A A A A A A A A A   |        | GBAA0349 iron compound ABC transporter, permease protein                                      |
| Chromosome | 362375 | C C C C C C C C C C C C C C C C C C C C C C   |        | GBAA0351 iron compound ABC transporter, iron compound-binding protein                         |
| Chromosome | 364023 | C C C C C C C C C C C C C C C C C C C C C C   |        | GBAA0352 pyridine nucleotide-disulfide oxidoreductase family protein                          |
| Chromosome | 364527 | T T T G G G G T G G G G T T G G G G T T T     |        |                                                                                               |
| Chromosome | 365204 | A A A A A A A A A A A A A A A A A A A A A G   |        |                                                                                               |
| Chromosome | 365960 | C C C C C C C C T T C T C T C T C C C C C C   |        |                                                                                               |
| Chromosome | 367738 | T T T T T T T T C T T T T T T T T T T T T T   |        |                                                                                               |
| Chromosome | 368154 | T T T T T T T G T T T T T T T T T T T T T     |        | GBAA0358 hypothetical protein                                                                 |
| Chromosome | 369804 | T T T T T T T T T T T T C T T T T T T T T T   |        |                                                                                               |
| Chromosome | 369853 | C C C C C C C C C C C C C C C C C C C C C C   |        |                                                                                               |
| Chromosome | 369896 | T T T T T T T T T T T T A T T T T T T T T T   |        | GBAA0360 hypothetical protein                                                                 |
| Chromosome | 369898 | A A A A A A A A A A A A C A A A A A A A A A   |        | GBAA0360 hypothetical protein                                                                 |
| Chromosome | 370061 | A A A A A A A A A A G A A A A A A A A A A A   |        | GBAA0360 hypothetical protein                                                                 |
| Chromosome | 370325 | A A A A A A A A G A A G A A A G A A A A A A   |        | GBAA0361 hypothetical protein                                                                 |
| Chromosome | 371765 | A A A A A A A A A A A A T A A A A A A A A A   |        | GBAA0362 hypothetical protein                                                                 |
| Chromosome | 376628 | A A A A A A A A G A A G A A A G A A A A A A   |        |                                                                                               |
| Chromosome | 381587 | G G G G G G G G G G G G G G G G G G G G G T   |        | GBAA0369 methyl-accepting chemotaxis protein                                                  |
| Chromosome | 382874 | G G G G G G G G G G G G G G G G G G G G G     |        | GBAA0370 methyl-accepting chemotaxis protein                                                  |
| Chromosome | 387637 | G G A A A A A A A A A A A A G A A A A A A A   |        | GBAA0373 endonuclease/exonuclease/phosphatase family protein                                  |
| Chromosome | 389243 | C C C C C C C C C C C C C C C C C C C C C C   |        | GBAA0374 hypothetical protein                                                                 |
| Chromosome | 389904 | A A A A A A A A A A A A C A A A A A A A A A   |        | GBAA0374 hypothetical protein                                                                 |
| Chromosome | 390263 | A A A A A A A A A A A A G A A A A A A A A A   |        | GBAA0374 hypothetical protein                                                                 |
| Chromosome | 391001 | G G G G G G G G G G A G A G G G G G G G G G   |        | GBAA0374 hypothetical protein                                                                 |
| Chromosome | 391858 | T T T T T T T T T T T T T T T T T T T T T T   | topB-1 | GBAA0375 DNA topoisomerase III                                                                |
| Chromosome | 393116 | A A A A A A A A G A A A A A A A G A A A A A   | topB-1 | GBAA0375 DNA topoisomerase III                                                                |
| Chromosome | 394707 | A A A A A A A A A A A A A A A A A A A A A G   | thiM   | GBAA0376 hydroxyethylthiazole kinase                                                          |
| Chromosome | 394789 | G G G G G G G G G G G G A G G G G G G G G G   | thiM   | GBAA0376 hydroxyethylthiazole kinase                                                          |
| Chromosome | 395298 | T T T T T T T T T T T T C T T T T T T T T T   | thiE   | GBAA0377 thiamine-phosphate pyrophosphorylase                                                 |
| Chromosome | 397924 | T T T T T T T T T T T T C T T T T T T T T T   |        | GBAA0379 methyl-accepting chemotaxis protein                                                  |
| Chromosome | 399186 | G G G T G G G G G G G G G G G G G G G G G     |        | GBAA0379 methyl-accepting chemotaxis protein                                                  |
| Chromosome | 401315 | A A A A A A A A A A A A G A A A A A A A A A   |        | GBAA0382 ABC transporter substrate-binding protein                                            |
| Chromosome | 403104 | T T T T T T T T T T T T T T T T T T T T C C   |        | GBAA0384 ABC transporter ATP-binding protein                                                  |
| Chromosome | 404435 | G G G C C C C C C C C C C C G C C C C C G C G |        |                                                                                               |
| Chromosome | 404486 | T T T T T T T T C T T C T T C T T T T T T     |        |                                                                                               |
| Chromosome | 404778 | C C C C C C C C T C C C C C C C T C C C C C C |        | GBAA0385 chitinase B                                                                          |
| Chromosome | 405765 | T T T T T T T T T T T T G T T T T T T T T     |        | GBAA0385 chitinase B                                                                          |
| Chromosome | 406142 | C C C C C C C C T T C C C C T T C C C C C C   |        | GBAA0385 chitinase B                                                                          |
| Chromosome | 413634 | T T T T C C T T T T T T T T T T T T C T T     |        |                                                                                               |
| Chromosome | 413643 | C C C C C C T T C C C C C C C C C C C C C C   |        |                                                                                               |
| Chromosome | 413724 | C C C C C C C C C C C C C C C C C C C C C C   |        |                                                                                               |
| Chromosome | 415544 | T T T T T T T T T T T A T T T T T T T T T T   | proS-1 | GBAA0396 prolyl-tRNA synthetase                                                               |
| Chromosome | 417981 | T T T T T T T T T T T C T T T T T T T T T     |        | GBAA0399 tellurium resistance protein, putative                                               |
| Chromosome | 421809 | T T T T T T T T T T T C T T T T T T T T T     |        | GBAA0403 hypothetical protein                                                                 |
| Chromosome | 422826 | G G G A A A A A G A A A A A A A A A A A G A   |        | GBAA0404 tellurite resistance protein, putative                                               |
| Chromosome | 426177 | A A A A A A A A A A A A A A A A A G A A A A   |        |                                                                                               |
| Chromosome | 427702 | T T T T T T T T T T T G T T T T T T T T T     |        | GBAA0408 hypothetical protein                                                                 |
| Chromosome | 430967 | T T T T T T T T C T T T T T T T C T T T T     |        |                                                                                               |
| Chromosome | 433277 | G G T T T T T T T T T T G T T T T T T T T T   |        |                                                                                               |
| Chromosome | 439686 | G G G G G G G G G G A G G G G G G A G G G G   | cax    | GBAA0419 calcium/proton exchanger                                                             |
| Chromosome | 441847 | G G G C C C C C C C C C C G G C C C C C G G   |        | GBAA0421 hypothetical protein                                                                 |
| Chromosome | 445658 | T T T T T T T T T T T G T T T T T T T T T     |        |                                                                                               |
| Chromosome | 449615 | T T T T T T T G G T G T G T T G G T T T T     |        |                                                                                               |
| Chromosome | 449659 | G G G G G G G A A A G A G A G A A G G G G G   |        |                                                                                               |
| Chromosome | 451584 | C C C T T T C T T T T T C T T T T T T C C     |        |                                                                                               |
| Chromosome | 451692 | T T T T T T T T T T T A T T T T T T T T T     |        | GBAA0431 hypothetical protein                                                                 |
| Chromosome | 452141 | T T T T T T T T T T C T T T T T T T T T T     |        |                                                                                               |
| Chromosome | 452368 | G G G G G G G G G G A G G G G G G G G G G     |        | GBAA0433 prophage LambdaBa04, DNA-binding protein                                             |
| Chromosome | 454306 | A A A A A A A A A A A A A A A A A G A A A     |        | GBAA0438 prophage LambdaBa04, DnaD replication protein, putative                              |
| Chromosome | 491169 | A A A A A A A A G A A A A A A A G A A A A     |        | GBAA0494 DNA-binding protein                                                                  |
| Chromosome | 497650 | A A A A A A A A A A A A A A A A A A A A A     |        | GBAA0503 hypothetical protein                                                                 |
| Chromosome | 500989 | A A A A A A A A A A A A A A A A A A A A A     |        | GBAA0507 NAD-dependent epimerase/dehydratase family protein                                   |
| Chromosome | 501752 | G G G G G G G G G G G T G G G G G G G G G     |        | GBAA0508 glycosyl transferase, group 2 family protein                                         |
| Chromosome | 503384 | T T T T T T T T T T C T T T T T T T T T T     |        |                                                                                               |
| Chromosome | 503449 | G G G G G G G A A A G A G A A A G G G G G     |        |                                                                                               |
| Chromosome | 503492 | C C C C C C A C C C C C C C C C C C C C C C   |        |                                                                                               |
| Chromosome | 507034 | G G G A G G G G G G G G G G G G G G G G G     |        |                                                                                               |
| Chromosome | 507652 | C C C T C C C C C C C C C C C C C C C C C     |        | GBAA0511 diacylglycerol glycosyltransferase                                                   |
| Chromosome | 510394 | T T T T T T T T T T C T T T T T T T T T T     |        | GBAA0514 chlorohydrolase family protein                                                       |
| Chromosome | 511175 | T T T T T T T C T T T T T T T C T T T T T     |        | GBAA0515 cell division inhibitor-like protein                                                 |
| Chromosome | 511396 | G G G G G G G G G G T G G G G G G G G G G     |        | GBAA0515 cell division inhibitor-like protein                                                 |
| Chromosome | 513052 | C C C C C C C C C C C C C C C C C C C C C C   |        |                                                                                               |
| Chromosome | 515111 | G G A A A A A A A A A A A A A A A A A A A     | mutY   | GBAA0522 A/G-specific adenine glycosylase                                                     |
| Chromosome | 515690 | G G G G G G G G G G G C G G G G G G G G G     | mutY   | GBAA0522 A/G-specific adenine glycosylase                                                     |
| Chromosome | 515711 | A A A A A A A A A A A A A A A A A A A A A     | mutY   | GBAA0522 A/G-specific adenine glycosylase                                                     |
| Chromosome | 516630 | A A A A G A A A A A A A A A A A A A A A A     |        | GBAA0524 small acid-soluble spore protein, gamma-type                                         |
| Chromosome | 517509 | A A A A A A A A A A A A A A A A A A A A A     |        | GBAA0527 hypothetical protein                                                                 |
| Chromosome | 517633 | A A A A A A A C C A C A C A C A C A C A C     |        | GBAA0527 hypothetical protein                                                                 |
| Chromosome | 517904 | A A A A A A A A A A A A A A A A A A A A A     |        | GBAA0527 hypothetical protein                                                                 |
| Chromosome | 519020 | G G G G G G G G G G A G G G G G G G G G G     |        | GBAA0528 ABC transporter permease/ATP-binding protein                                         |
| Chromosome | 520655 | G G G G G G G G G G A G G G G G G G G G G     |        | GBAA0529 putative lipoprotein                                                                 |
| Chromosome | 521963 | A A G A A A A A A A A A A A A A A A A A A     |        | GBAA0530 glutamate synthase, large subunit, putative                                          |
| Chromosome | 528347 | T T T T T T A A T A T A T A T T T T T T       |        | GBAA0533 ABC transporter permease                                                             |
| Chromosome | 529282 | G G G G G G G G G G A G G G G G G G G G G     |        | GBAA0534 ABC transporter permease                                                             |
| Chromosome | 530479 | G G G G G G G G G G T T G G G G G G G G G     | bOp    | GBAA0536 bacterioferritin comigratory protein                                                 |
| Chromosome | 531610 | T T T T T T T T T T C T T T T T T T T T T     |        |                                                                                               |
| Chromosome | 542163 | A A A A A A A A G A A A A A A A G A A A A     |        |                                                                                               |
| Chromosome | 543535 | T T T T T T T T T T C T T T T T T T T T T     |        | GBAA0545 iron-sulfur cluster-binding protein, putative                                        |
| Chromosome | 543941 | C C C C C C C C C C C C C C C C C C C C C C   |        | GBAA0545 iron-sulfur cluster-binding protein, putative                                        |
| Chromosome | 544550 | T T T T T T T T T T A T T T T T T T T T       |        | GBAA0546 hypothetical protein                                                                 |
| Chromosome | 544551 | G G G G G G G G G G G G G G G G G G G G G     |        | GBAA0546 hypothetical protein                                                                 |



























|            |         |     |   |   |   |   |   |   |   |   |   |   |   |   |   |   |   |       |          |                                                                                        |
|------------|---------|-----|---|---|---|---|---|---|---|---|---|---|---|---|---|---|---|-------|----------|----------------------------------------------------------------------------------------|
| Chromosome | 3155209 | T   | T | T | T | T | T | C | T | T | T | T | T | C | T | T | T | lkt-1 | GBAA3432 | transketolase                                                                          |
| Chromosome | 3157345 | C   | C | C | C | C | C | C | C | C | C | C | C | C | C | C | C | zwf   | GBAA3433 | glucose-6-phosphate 1-dehydrogenase                                                    |
| Chromosome | 3162846 | A   | A | A | A | A | A | A | C | A | G | A | A | A | A | A | A |       | GBAA3440 | short chain dehydrogenase/reductase family oxidoreductase                              |
| Chromosome | 3162871 | C   | C | C | T | T | C | T | T | T | T | T | T | T | T | T | C |       | GBAA3440 | short chain dehydrogenase/reductase family oxidoreductase                              |
| Chromosome | 3166431 | A   | A | A | A | A | A | A | T | A | A | A | A | T | T | A | A |       | GBAA3443 | enhancin family protein                                                                |
| Chromosome | 3169023 | G   | G | G | G | G | G | G | G | G | G | G | G | G | G | G | G |       |          |                                                                                        |
| Chromosome | 3173657 | A   | A | A | A | A | A | A | G | A | G | A | G | A | G | A | A |       | GBAA3448 | 4-oxalocrotonate tautomerase family protein                                            |
| Chromosome | 3175072 | G   | G | G | G | G | G | G | G | G | G | G | G | G | G | G | G |       | GBAA3450 | glyoxalase family protein                                                              |
| Chromosome | 3177938 | A   | A | A | A | A | A | C | C | A | A | A | A | C | C | A | A |       | GBAA3452 | hypothetical protein                                                                   |
| Chromosome | 3178284 | G   | G | G | G | G | G | G | G | A | G | G | G | G | G | G | G |       |          |                                                                                        |
| Chromosome | 3181350 | G   | G | G | G | G | A | A | G | G | G | A | G | G | G | A | G |       | GBAA3458 | GntR family transcriptional regulator                                                  |
| Chromosome | 3181685 | A   | A | A | A | A | A | A | A | A | A | A | A | G | A | A | A |       |          |                                                                                        |
| Chromosome | 3181688 | A   | A | A | A | A | A | C | A | A | A | A | A | A | A | C | A |       |          |                                                                                        |
| Chromosome | 3182039 | G   | G | G | G | G | G | G | G | A | G | G | G | G | G | G | G |       |          |                                                                                        |
| Chromosome | 3182245 | A   | A | A | A | A | A | A | G | A | G | A | G | A | G | A | A |       |          |                                                                                        |
| Chromosome | 3187421 | G   | G | G | G | G | G | G | A | G | G | G | G | G | G | G | G |       | GBAA3465 | metallo-beta-lactamase family protein                                                  |
| Chromosome | 3188248 | G   | G | G | G | G | A | A | G | A | G | A | G | A | G | A | G |       | GBAA3466 | hypothetical protein                                                                   |
| Chromosome | 3188654 | C   | C | C | C | C | C | C | T | C | C | C | C | C | T | C | C |       | GBAA3466 | hypothetical protein                                                                   |
| Chromosome | 3189667 | A   | A | A | A | A | A | A | C | A | A | A | G | A | A | A | A |       |          |                                                                                        |
| Chromosome | 3189885 | A   | A | A | A | A | A | A | A | A | G | A | A | A | A | A | A |       | GBAA3468 | hypothetical protein                                                                   |
| Chromosome | 3193073 | C   | C | C | C | C | C | C | C | C | T | C | C | C | C | C | C |       |          |                                                                                        |
| Chromosome | 3196691 | C   | C | C | C | C | C | T | C | C | C | C | C | C | T | C | C |       | GBAA3477 | hypothetical protein                                                                   |
| Chromosome | 3197166 | A   | A | A | G | A | A | A | A | A | A | A | A | A | A | A | A |       |          |                                                                                        |
| Chromosome | 3198903 | T   | T | T | T | T | T | T | C | T | T | T | T | T | T | T | T |       |          |                                                                                        |
| Chromosome | 3199714 | C   | C | C | C | C | C | C | C | C | T | A | T | C | C | C | C |       | GBAA3480 | glycosyl transferase, group 2 family protein/polysaccharide deacetylase family protein |
| Chromosome | 3209707 | G   | G | G | G | G | G | G | G | A | G | G | G | G | G | G | G |       | GBAA3490 | DeoR family transcriptional regulator                                                  |
| Chromosome | 3213054 | A   | A | A | A | A | A | A | G | A | G | A | G | A | G | A | A |       | GBAA3494 | hypothetical protein                                                                   |
| Chromosome | 3213664 | A   | A | A | A | A | A | C | C | A | A | A | A | C | C | A | A |       |          |                                                                                        |
| Chromosome | 3213784 | C   | C | C | C | C | C | C | C | C | T | C | C | C | C | C | C |       |          |                                                                                        |
| Chromosome | 3215077 | G   | G | G | G | G | G | G | G | G | G | G | G | G | G | G | A |       | GBAA3497 | hydroxylamine reductase                                                                |
| Chromosome | 3215448 | A   | A | A | G | G | A | G | G | G | A | G | G | G | G | G | A |       | GBAA3498 | hypothetical protein                                                                   |
| Chromosome | 3218493 | C   | C | C | C | C | C | C | C | T | C | C | C | C | C | C | C |       | GBAA3501 | lysozyme, putative                                                                     |
| Chromosome | 3219340 | A   | A | A | A | A | A | C | C | A | A | A | C | C | A | A | A |       |          |                                                                                        |
| Chromosome | 3219928 | A   | A | A | A | A | A | A | A | A | G | A | A | A | A | A | A |       | GBAA3505 | hypothetical protein                                                                   |
| Chromosome | 3219986 | A   | A | A | A | A | A | A | A | A | G | A | A | A | A | A | A |       |          |                                                                                        |
| Chromosome | 3220853 | G   | G | G | G | G | A | A | G | G | G | A | A | G | G | G | G |       | GBAA3506 | penicillin-binding protein, putative                                                   |
| Chromosome | 3224648 | T   | T | T | T | T | T | C | T | T | T | T | T | T | T | T | T |       | GBAA3512 | hypothetical protein                                                                   |
| Chromosome | 3227122 | A   | A | A | G | G | A | A | G | G | A | G | G | G | G | G | A |       |          |                                                                                        |
| Chromosome | 3231414 | G   | G | G | G | G | G | G | G | G | G | A | G | G | G | G | G |       | GBAA3519 | hypothetical protein                                                                   |
| Chromosome | 3236875 | G   | G | G | G | G | G | G | G | T | T | G | G | G | G | G | G |       | GBAA3527 | hypothetical protein                                                                   |
| Chromosome | 3237313 | C   | C | C | C | C | C | C | C | T | C | C | C | C | C | C | C |       |          |                                                                                        |
| Chromosome | 3240209 | T   | T | T | T | T | T | T | G | T | T | T | T | T | C | T | T |       | GBAA3531 | iron compound ABC transporter, iron compound-binding protein, putative                 |
| Chromosome | 3243257 | G   | G | G | G | G | A | A | G | A | G | A | G | A | G | G | G |       | GBAA3535 | hypothetical protein                                                                   |
| Chromosome | 3244553 | T   | T | T | T | T | T | T | T | T | T | T | T | T | T | T | T |       | GBAA3536 | PhzF family phenazine biosynthesis protein                                             |
| Chromosome | 3245669 | T   | T | T | T | T | T | T | T | T | T | T | T | T | T | T | T |       | GBAA3537 | hypothetical protein                                                                   |
| Chromosome | 3248540 | A   | A | A | G | G | A | G | G | G | A | A | G | G | G | A | A |       |          |                                                                                        |
| Chromosome | 3250909 | A   | A | A | A | A | A | G | A | A | A | A | A | A | A | A | A |       | GBAA3545 | phosphoglycerate mutase, putative                                                      |
| Chromosome | 3251202 | C   | C | C | C | C | C | C | C | T | C | C | C | C | C | C | C |       | GBAA3545 | phosphoglycerate mutase, putative                                                      |
| Chromosome | 3252973 | C   | C | C | C | C | C | C | C | C | C | C | C | C | C | C | C |       | GBAA3547 | MutS family protein, putative                                                          |
| Chromosome | 3253921 | A   | A | A | A | A | A | A | A | C | A | A | A | A | A | A | A |       | GBAA3547 | MutS family protein, putative                                                          |
| Chromosome | 3255672 | T   | T | T | T | T | T | T | C | T | T | T | T | T | T | T | T |       | amyS     | cytoplasmic alpha-amylase                                                              |
| Chromosome | 3256477 | A   | A | A | A | A | A | C | G | A | A | A | A | G | A | A | A |       | amyS     | cytoplasmic alpha-amylase                                                              |
| Chromosome | 3256688 | T   | T | T | C | C | T | C | C | C | T | T | T | C | C | C | T |       | amyS     | cytoplasmic alpha-amylase                                                              |
| Chromosome | 3256720 | G   | G | G | G | G | A | A | G | G | G | A | A | G | G | G | G |       | amyS     | cytoplasmic alpha-amylase                                                              |
| Chromosome | 3256870 | T   | T | T | C | C | T | C | C | C | T | T | T | C | C | C | T |       | amyS     | cytoplasmic alpha-amylase                                                              |
| Chromosome | 3257937 | A   | A | A | A | A | A | A | A | A | G | A | A | A | A | A | A |       |          |                                                                                        |
| Chromosome | 3257981 | G   | G | G | G | G | G | G | G | G | A | G | G | G | G | G | G |       |          |                                                                                        |
| Chromosome | 3259199 | T   | T | T | T | T | T | T | T | C | T | T | T | T | T | T | T |       | pepF-2   | oligoendopeptidase F                                                                   |
| Chromosome | 3259585 | C   | C | C | C | C | A | A | C | A | C | A | C | C | C | C | C |       | pepF-2   | oligoendopeptidase F                                                                   |
| Chromosome | 3260131 | A   | A | A | A | A | A | A | A | A | A | A | G | A | A | A | A |       |          |                                                                                        |
| Chromosome | 3261725 | G   | G | A | A | A | A | A | A | G | A | A | A | A | A | A | A |       | GBAA3556 | major facilitator family transporter                                                   |
| Chromosome | 3262870 | T   | T | T | T | T | T | T | T | T | T | T | T | T | T | T | T |       | GBAA3556 | major facilitator family transporter                                                   |
| Chromosome | 3264610 | A   | A | A | A | A | A | G | A | A | A | G | A | A | A | A | A |       | GBAA3559 | hypothetical protein                                                                   |
| Chromosome | 3264678 | T   | T | T | T | T | T | C | T | T | T | T | T | T | T | T | T |       | GBAA3559 | hypothetical protein                                                                   |
| Chromosome | 3270956 | A   | A | A | A | A | A | G | A | A | A | A | A | G | A | A | A |       | GBAA3565 | ArsR family transcriptional regulator                                                  |
| Chromosome | 3271305 | A   | A | A | A | A | A | A | A | C | A | A | A | A | A | A | A |       | GBAA3566 | alcohol dehydrogenase, zinc-containing                                                 |
| Chromosome | 3275914 | G   | G | G | G | G | G | G | A | G | G | G | G | A | A | G | G |       | paiB-2   | protease synthase and sporulation negative regulatory protein PAI 2                    |
| Chromosome | 3277854 | G   | G | G | G | G | A | A | G | G | G | A | A | G | G | G | G |       | GBAA3574 | bile acid transporter family protein                                                   |
| Chromosome | 3279398 | A   | A | A | A | A | A | T | A | A | A | A | A | A | T | A | A |       | GBAA3575 | glycolate oxidase, subunit GicD, putative                                              |
| Chromosome | 3279991 | A   | A | A | A | A | A | A | A | A | G | A | A | A | A | A | A |       |          |                                                                                        |
| Chromosome | 3284777 | A   | A | A | A | A | A | A | A | C | A | A | A | A | A | A | A |       | GBAA3581 | degT/dmrJ/eryC1/strS family protein                                                    |
| Chromosome | 3285490 | T   | T | T | T | T | T | A | T | T | T | T | T | A | A | T | T |       | GBAA3582 | glycosyl transferase, group 2 family protein                                           |
| Chromosome | 3288865 | C   | C | C | C | C | C | C | C | C | C | C | C | C | C | C | C |       | GBAA3584 | collagenase, putative                                                                  |
| Chromosome | 3291655 | T   | T | T | T | T | T | T | T | T | T | T | T | T | T | T | T |       |          |                                                                                        |
| Chromosome | 3293046 | A   | A | A | A | A | A | A | A | A | G | A | A | A | A | A | A |       | GBAA3586 | acetyltransferase                                                                      |
| Chromosome | 3293895 | A   | A | A | A | A | A | A | A | A | G | A | A | A | A | A | A |       | GBAA3587 | glyoxalase family protein                                                              |
| Chromosome | 3294750 | G   | G | G | G | G | G | G | G | G | G | G | G | G | G | G | G |       | GBAA3588 | putative lipoprotein                                                                   |
| Chromosome | 3295143 | G   | G | G | G | G | G | A | A | G | G | G | A | G | G | G | G |       | GBAA3588 | putative lipoprotein                                                                   |
| Chromosome | 3295225 | G   | G | G | G | G | G | G | G | A | G | G | G | G | G | G | G |       | GBAA3588 | putative lipoprotein                                                                   |
| Chromosome | 3297853 | T   | T | T | T | T | T | T | T | T | T | T | T | T | T | T | T |       | GBAA3591 | hypothetical protein                                                                   |
| Chromosome | 3298258 | A   | A | A | A | A | A | T | A | A | A | A | A | A | A | A | A |       | GBAA3592 | hypothetical protein                                                                   |
| Chromosome | 3303342 | C   | C | C | C | C | C | C | C | C | T | C | C | C | C | C | C |       | GBAA3600 | acetyltransferase                                                                      |
| Chromosome | 3304199 | A   | A | A | A | A | A | G | A | A | A | A | A | A | A | A | A |       | GBAA3601 | hypothetical protein                                                                   |
| Chromosome | 3304424 | G   | G | G | A | A | G | G | G | G | G | G | G | G | A | A | G |       | GBAA3601 | hypothetical protein                                                                   |
| Chromosome | 3306232 | A   | A | A | A | A | A | A | A | G | A | A | A | A | A | A | A |       | GBAA3601 | hypothetical protein                                                                   |
| Chromosome | 3310574 | G   | G | A | A | A | A | A | A | A | G | A | A | A | A | A | A |       | GBAA3601 | hypothetical protein                                                                   |
| Chromosome | 3310645 | A   | A | A | A | A | A | A | A | A | G | A | A | A | A | A | A |       | GBAA3601 | hypothetical protein                                                                   |
| Chromosome | 3310809 | C   | C | C | C | C | C | T | C | T | C | T | T | C | C | C | C |       |          |                                                                                        |
| Chromosome | 3311851 | G   | G | G | G | T | G | G | G | G | G | G | G | G | T | G | G |       | GBAA3603 | acetyltransferase                                                                      |
| Chromosome | 3312017 | A   | A | A | A | A | A | A | A | G | A | A | A | A | A | A | A |       | GBAA3603 | acetyltransferase                                                                      |
| Chromosome | 3313061 | C   | C | C | C | C | C | C | C | C | C | C | C | C | C | C | C |       | argH-1   | argininosuccinate lyase                                                                |
| Chromosome | 3313113 | G   | G | G | G | G | G | G | G | A | C | G | G | G | G | G | G |       | argH-1   | argininosuccinate lyase                                                                |
| Chromosome | 3313282 | T   | T | T | T | T | T | T | T | T | T | T | T | T | T | T | T |       | argH-1   | argininosuccinate lyase                                                                |
| Chromosome | 3313339 | A   | A | A | A | A | A | A | A | T | A | A | A | A | A | A | A |       | argH-1   | argininosuccinate lyase                                                                |
| Chromosome | 3314718 | G   | G | G | G | G | A | A | G | G | G | A | A | G | G | G | G |       | GBAA3605 | hypothetical protein                                                                   |
| Chromosome | 3315017 | G   | G | G | G | G | A | A | G | G | G | A | A | G | G | G | G |       | GBAA3605 | hypothetical protein                                                                   |
| Chromosome | 3320108 | G   | G | G | G | G | A | A | A | G | A | A | A | A | G | G | G |       | fabG     | 3-ketoacyl-(acyl-carrier-protein) reductase                                            |
| Chromosome | 3320794 | T</ |   |   |   |   |   |   |   |   |   |   |   |   |   |   |   |       |          |                                                                                        |
