# Supplementary material
Source: PubMed Central journal article supplement (PMC2916593)
Supplement: supp_48_8_2821__2.pdf [file supp_48_8_2821__2.pdf]

**Table S2. Oligoprimers for 80-*tas*SNPs typing for *B. anthracis***

| Well | Target     | SNPs       |                     | Forward primer         |                     | Reverse primer         |                 | Amplicon<br>Position of amplicon *<br>(bp) | ORF ID              | Gene         | Product                                                  |
|------|------------|------------|---------------------|------------------------|---------------------|------------------------|-----------------|--------------------------------------------|---------------------|--------------|----------------------------------------------------------|
|      |            | Position * | primer name         | primer sequence        | primer name         | primer sequence        |                 |                                            |                     |              |                                                          |
| A1   | Chromosome | 4429       | 01_BA_grs4429_F1    | GCACGTCCCTAAATAGC      | 01_BA_grs4429_R1    | GGGATACGCCCTCATATT     | 4291-4549       | 259                                        | GBA0004             | <i>recF</i>  | recombination protein F                                  |
| B1   | Chromosome | 23173      | 02_BA_grs23173_F1   | TACGATGTCAGTTCATGAT    | 02_BA_grs23173_R1   | ACCAAGCTCACAAATATAT    | 23025-23298     | 274                                        | GBA0015             | -            | deoxyribose kinase family protein                        |
| C1   | Chromosome | 39296      | 03_BA_grs39296_F1   | GAAGATGCTCCGGGAAGC     | 03_BA_grs39296_R1   | TCCTTCCCTCCCTTAGGATA   | 39249-39548     | 300                                        | GBA0031             | -            | hypothetical protein                                     |
| D1   | Chromosome | 40930      | 04_BA_grs40930_F1   | GTCGCTAAATGTCGAGATTGT  | 04_BA_grs40930_R1   | TCCAACTGATATCCGCCGATC  | 40737-41054     | 318                                        | GBA00034            | <i>abrB</i>  | transition state transpositional regulatory protein AbrB |
| E1   | Chromosome | 69952      | 05_BA_grs69952_F1   | TACCTGATGCCAGGGAGAAC   | 05_BA_grs69952_R1   | ATAACTCCCTTACTTTTCC    | 69806-70056     | 251                                        | GBA00064            | <i>ftsh</i>  | glutaminyl-tRNA synthetase                               |
| F1   | Chromosome | 97542      | 06_BA_grs97542_F1   | TCGCTGATGCAAGATGGTAA   | 06_BA_grs97542_R1   | TGCTTAGCTTCTTCTCTGT    | 97415-97673     | 259                                        | GBA00086            | <i>ptxX</i>  | 4-aminobutyrate aminotransferase                         |
| G1   | Chromosome | 176587     | 07_BA_grs176587_F1  | GGCTAAATTTGACCCATAATG  | 07_BA_grs176587_R1  | ACCGAATTTTCAACAGATA    | 176441-176762   | 322                                        | GBA00175            | -            | ABC transporter substrate-binding protein                |
| H1   | Chromosome | 182106     | 08_BA_grs182106_F1  | AAAGGCGAGACAAATCCAGG   | 08_BA_grs182106_R1  | TCTGATCAACAGCCCTCTA    | 181932-182205   | 274                                        | GBA00180            | -            | hypothetical protein                                     |
| A2   | Chromosome | 199433     | 09_BA_grs199433_F1  | GCATGGTGCATGGAAATTTAT  | 09_BA_grs199433_R1  | CCCAACCATCCATGCAACTA   | 199256-199538   | 283                                        | GBA00189            | -            | nucleoside transporter                                   |
| B2   | Chromosome | 240050     | 10_BA_grs240050_F1  | GGCCCAATTTGGTGTAGATG   | 10_BA_grs240050_R1  | TGGTATAAATCTCTCCCACT   | 239852-240211   | 280                                        | GBA00252            | <i>dalI</i>  | alanine racemase                                         |
| C2   | Chromosome | 333553     | 11_BA_grs333553_F1  | AGCCGCTACTCTCTACTACT   | 11_BA_grs333553_R1  | TGACCAACCTTAATCTCCAACT | 333442-333707   | 266                                        | GBA00325            | <i>gabT</i>  | transcriptional regulator domain-containing protein      |
| D2   | Chromosome | 350432     | 12_BA_grs350432_F1  | TTGCGAATGTAGGAAGATGAT  | 12_BA_grs350432_R1  | TCTGCTGCTGAACCTCAATG   | 350277-350583   | 307                                        | GBA00340            | -            | noncoding region                                         |
| E2   | Chromosome | 364527     | 13_BA_grs364527_F1  | GGGATGATTTCCGTCATGA    | 13_BA_grs364527_R1  | CGTCCAGCAACGGTAAATGTA  | 364393-364678   | 286                                        | GBA00352-0353       | -            | noncoding region                                         |
| F2   | Chromosome | 382874     | 14_BA_grs382874_F1  | CGCTTGGAAAGTTAGAGAGG   | 14_BA_grs382874_R1  | GGCCGCCCAAGAAATATCT    | 382758-383028   | 271                                        | GBA00370            | -            | methyl-accepting chemotaxis protein                      |
| G2   | Chromosome | 515111     | 15_BA_grs515111_F1  | GGGGTCATGTTGGACAC      | 15_BA_grs515111_R1  | CCTTCCCATCTTTTACAC     | 514871-515239   | 269                                        | GBA00522            | <i>mutY</i>  | A/G-specific adenine glycosylase                         |
| H2   | Chromosome | 562925     | 16_BA_grs562925_F1  | CCTGGTAAATGGTGTGAAAG   | 16_BA_grs562925_R1  | TGAGTATAGCCGATTTTCG    | 561948-562649   | 322                                        | GBA00561            | -            | citrate transporter                                      |
| A3   | Chromosome | 610254     | 17_BA_grs610254_F1  | ATGCAATGCGTGTACTACGA   | 17_BA_grs610254_R1  | GAATACCTCGTGTATTAAGC   | 610118-610451   | 334                                        | GBA00595-0596       | -            | noncoding region                                         |
| B3   | Chromosome | 701044     | 18_BA_grs701044_F1  | AGAGAGGTCAGAGATATGC    | 18_BA_grs701044_R1  | CTGATCACTCTTATTACACTA  | 700968-701244   | 257                                        | GBA00682            | -            | hypothetical protein                                     |
| C3   | Chromosome | 835614     | 19_BA_grs835614_F1  | TAGCCTTTAGTCCGCTGGA    | 19_BA_grs835614_R1  | TGACCCGCGCGAATTCGATA   | 835445-835740   | 296                                        | GBA00823            | -            | PTS system, sucrose-specific IIBO component              |
| D3   | Chromosome | 965225     | 20_BA_grs965225_F1  | ACCATGAAATTTGGATATGATG | 20_BA_grs965225_R1  | CCCTAATGACACGAGATCTC   | 965143-965398   | 251                                        | GBA00961            | -            | hypothetical protein                                     |
| E3   | Chromosome | 974706     | 21_BA_grs974706_F1  | GGAAATTAACGTAATCTTGG   | 21_BA_grs974706_R1  | CAGGACCAATATCCCTAAT    | 973613-973868   | 251                                        | GBA00972            | -            | hypothetical protein                                     |
| F3   | Chromosome | 1052069    | 22_BA_grs1052069_F1 | GGAGCTGCACCTTAGTGA     | 22_BA_grs1052069_R1 | GGATTACTCTGGGAATACA    | 1051906-1052156 | 251                                        | GBA01070            | <i>hemE</i>  | uroporphyrinogen decarboxylase                           |
| G3   | Chromosome | 1136244    | 23_BA_grs1136244_F1 | CGCTTGTCTACTCAGTAAT    | 23_BA_grs1136244_R1 | CGATCAAGTACCTATTGTA    | 1136046-1136375 | 330                                        | GBA01166-1167       | -            | noncoding region                                         |
| H3   | Chromosome | 1296700    | 24_BA_grs1296700_F1 | GAATTAAGACATGGCTACAC   | 24_BA_grs1296700_R1 | CTTGATTTTACATCACTCTGTG | 1296531-1296835 | 305                                        | GBA01353-1354       | -            | noncoding region                                         |
| A4   | Chromosome | 2423657    | 25_BA_grs2423657_F1 | GTAAAGCACTAAAGAGTAGC   | 25_BA_grs2423657_R1 | CCTCAACCAACCGTAAATTTT  | 2423550-2423815 | 266                                        | GBA02601-2602       | -            | noncoding region                                         |
| B4   | Chromosome | 2548040    | 26_BA_grs2548040_F1 | ACCGTGTCTTTAATGATC     | 26_BA_grs2548040_R1 | TGGTGTATGTTGTTTATGAG   | 2547877-2548167 | 291                                        | GBA02732-2733       | -            | noncoding region                                         |
| C4   | Chromosome | 2619247    | 27_BA_grs2619247_F1 | TACTTCTTACTCTTAAATTC   | 27_BA_grs2619247_R1 | GAGATTACCACTGGCATGTA   | 2619137-2619414 | 278                                        | GBA02823            | -            | hypothetical protein                                     |
| D4   | Chromosome | 2837448    | 28_BA_grs2837448_F1 | CTGATCGAAGTATGACATTAAT | 28_BA_grs2837448_R1 | GGCTTCACTCAATTAATCTGTA | 2837327-2837636 | 310                                        | GBA02841            | -            | hypothetical protein                                     |
| E4   | Chromosome | 2832579    | 29_BA_grs2832579_F1 | TGGCTTACTCGGTGATTCG    | 29_BA_grs2832579_R1 | TACCCAGTAAGATGAGTGTG   | 2832482-2832764 | 283                                        | GBA03074            | -            | hypothetical protein                                     |
| F4   | Chromosome | 2979236    | 30_BA_grs2979236_F1 | CGCTACTACATAGCAAGATA   | 30_BA_grs2979236_R1 | GTAGTGGGCTTACAGTCT     | 2979043-2979446 | 304                                        | GBA03232-3234       | -            | noncoding region                                         |
| G4   | Chromosome | 3237313    | 31_BA_grs3237313_F1 | CTTACTCAGCCTAAACGGTAA  | 31_BA_grs3237313_R1 | GCCTTTGATTCATCATATG    | 3237173-3237453 | 281                                        | GBA03527-3529       | -            | noncoding region                                         |
| H4   | Chromosome | 3491802    | 32_BA_grs3491802_F1 | CCTGATTTTCCGCTGATTA    | 32_BA_grs3491802_R1 | GAGTATAAAGAGTGGGAAGT   | 3491676-3491928 | 253                                        | GBA03805            | -            | phage LambdaDba01, acyltransferase, putative             |
| A5   | Chromosome | 3494352    | 33_BA_grs3494352_F1 | TCAATTTCCGGATGCTCTCTC  | 33_BA_grs3494352_R1 | GAGCACTTATAGTGGGTTTTA  | 3494204-3494548 | 345                                        | GBA03807            | -            | noncoding region                                         |
| B5   | Chromosome | 3495950    | 34_BA_grs3495950_F1 | CACCATACCTTAGCTGATTT   | 34_BA_grs3495950_R1 | GGTTTCGTGTATAAGAGAATC  | 3494932-3495159 | 268                                        | GBA03809-3810       | -            | noncoding region                                         |
| C5   | Chromosome | 3755462    | 35_BA_grs3755462_F1 | CCATCTACACAGCTGACT     | 35_BA_grs3755462_R1 | ACACTATGGTAAAGTAATGA   | 3755296-3755588 | 293                                        | GBA04078            | -            | phage minor structural protein                           |
| D5   | Chromosome | 4285510    | 36_BA_grs4285510_F1 | GTCCGCTCTTTTCTAGATTT   | 36_BA_grs4285510_R1 | AGCGAAGTAAACCAATCTTCTA | 4285357-4285568 | 302                                        | GBA04708-4707       | -            | noncoding region                                         |
| E5   | Chromosome | 4347810    | 37_BA_grs4347810_F1 | GCTTCCCTCCGACCTTTTT    | 37_BA_grs4347810_R1 | GGCAATGTTACGAAAGGTAAG  | 4347661-4348002 | 342                                        | GBA04783            | -            | hypothetical protein                                     |
| F5   | Chromosome | 4703906    | 38_BA_grs4703906_F1 | ATTTCTATATGGCCATGTC    | 38_BA_grs4703906_R1 | TTCGATGGCAAGAGATATG    | 4703792-4704045 | 254                                        | phnA - GBA05178     | -            | noncoding region                                         |
| G5   | Chromosome | 4847882    | 39_BA_grs4847882_F1 | ATGGAGCTGAACCTTTAGAAG  | 39_BA_grs4847882_R1 | TTTGTTTGCAAAACGTTGTA   | 4847744-4847995 | 252                                        | GBA05352            | -            | hypothetical protein                                     |
| H5   | Chromosome | 5205997    | 40_BA_grs5205997_F1 | CGCATACCTTAGCTGATTT    | 40_BA_grs5205997_R1 | GGCTTTCGTGTATAAGAGAATC | 5205823-5206159 | 268                                        | GBA05388            | -            | noncoding region                                         |
| A6   | Chromosome | 5205997    | 41_BA_grs5205997_F1 | TGCCCTTATCCGCTGCTCT    | 41_BA_grs5205997_R1 | GGAAGTGGTCCGATGATCTC   | 5205906-5205261 | 256                                        | GBA05714            | <i>yyuG</i>  | senary box histidine kinase YyuG                         |
| B6   | pX01       | 6815       | 42_BA_p1rs6815_F1   | AGCTTCCATTAATGCTATA    | 42_BA_p1rs6815_R1   | GAAGCACTTGAAGATATACAC  | 6655-6915       | 261                                        | GBA0_pX01.0011      | -            | reverse transcriptase/endonuclease protein, (pX01-07)    |
| C6   | pX01       | 7452       | 43_BA_p1rs7452_F1   | GGTGCAGCAATTTGCTATA    | 43_BA_p1rs7452_R1   | GGAAGAGCTGAAAGTATGATG  | 7303-7604       | 302                                        | GBA0_pX01.0011      | -            | reverse transcriptase/endonuclease protein, (pX01-07)    |
| D6   | pX01       | 8228       | 44_BA_p1rs8228_F1   | CGCATTCCTTAGAGTTCT     | 44_BA_p1rs8228_R1   | ATCTATGCTCCCAACCAATC   | 8032-8381       | 350                                        | GBA0_pX01.0011      | -            | reverse transcriptase/endonuclease protein, (pX01-07)    |
| E6   | pX01       | 16266      | 45_BA_p1rs16266_F1  | TACCAACACATCTTCTTAAC   | 45_BA_p1rs16266_R1  | CGTGTGTGTGTGTGGAAGA    | 15221-16459     | 339                                        | GBA0_pX01.0019      | -            | hypothetical protein                                     |
| F6   | pX01       | 16661      | 46_BA_p1rs16661_F1  | TAGCCCTTACCATTTTAGC    | 46_BA_p1rs16661_R1  | CTGAAGCTGTAAAGCATAT    | 16590-16802     | 294                                        | GBA0_pX01.0019      | -            | hypothetical protein                                     |
| G6   | pX01       | 21211      | 47_BA_p1rs21211_F1  | GGCTACTTCTGTCTAAACA    | 47_BA_p1rs21211_R1  | CGCTTACTCTCATTACT      | 21072-21397     | 326                                        | GBA0_pX01.0021-0022 | -            | noncoding region                                         |
| H6   | pX01       | 22801      | 48_BA_p1rs22801_F1  | CGCGTCACTTCCAAATGTAAC  | 48_BA_p1rs22801_R1  | ATAGCTTAAAGAAAGCTTTGT  | 22861-22919     | 259                                        | GBA0_pX01.0023      | -            | hypothetical protein                                     |
| A7   | pX01       | 30910      | 49_BA_p1rs30910_F1  | GCACGATAAAGATGATGATG   | 49_BA_p1rs30910_R1  | CGTTTGTCTTAGAAGTACT    | 30748-31087     | 340                                        | GBA0_pX01.0034      | -            | hypothetical protein                                     |
| B7   | pX01       | 33338      | 50_BA_p1rs33338_F1  | CTCTTTCGGGCTTACATCT    | 50_BA_p1rs33338_R1  | CGCTTATCACTTTCAGATAAG  | 33478-33746     | 269                                        | GBA0_pX01.0038-0037 | -            | noncoding region                                         |
| C7   | pX01       | 41424      | 51_BA_p1rs41424_F1  | AGCTGCTATATAGAGCATCAT  | 51_BA_p1rs41424_R1  | AGAAAGCTGTCTATCACTAT   | 41290-41567     | 278                                        | GBA0_pX01.0046      | -            | TetR family transcriptional regulator                    |
| D7   | pX01       | 45155      | 52_BA_p1rs45155_F1  | AACTTCCCTTATCCGCAATCT  | 52_BA_p1rs45155_R1  | TGAACTGATGCGAAAGCAACT  | 45038-45340     | 303                                        | GBA0_pX01.0052      | -            | hypothetical protein                                     |
| E7   | pX01       | 45588      | 53_BA_p1rs45588_F1  | CTCAATCATATCAGGTTGATC  | 53_BA_p1rs45588_R1  | TAACTGATGCGGAGGATTAAT  | 45429-45698     | 270                                        | GBA0_pX01.0053      | -            | hypothetical protein                                     |
| F7   | pX01       | 61814      | 54_BA_p1rs61814_F1  | GCATGATGTTGGTGTGTTCT   | 54_BA_p1rs61814_R1  | CAATGAAGTATGTCGCGCAT   | 61865-61979     | 295                                        | GBA0_pX01.0071-0072 | -            | noncoding region                                         |
| G7   | pX01       | 106857     | 55_BA_p1rs106857_F1 | TGATGATGTTGCTGCTACTTA  | 55_BA_p1rs106857_R1 | CGCTTATAGCTTTTACTTCTC  | 106868-106854   | 369                                        | GBA0_pX01.0123-0124 | -            | noncoding region                                         |
| H7   | pX01       | 123207     | 56_BA_p1rs123207_F1 | TGAATTTGAAAAGGGATTTCT  | 56_BA_p1rs123207_R1 | ACTCTAATCCGCTTCTATGCTC | 123130-123283   | 263                                        | GBA0_pX01.0142      | -            | noncoding region                                         |
| A8   | pX01       | 126170     | 57_BA_p1rs126170_F1 | TTTCCCTCGATATGATGATG   | 57_BA_p1rs126170_R1 | GGCGGATTTTATCAAGCTCA   | 126039-126340   | 302                                        | GBA0_pX01.0142-0145 | -            | noncoding region                                         |
| B8   | pX01       | 138295     | 58_BA_p1rs138295_F1 | GGGTATGTTGTTTCTTATGCG  | 58_BA_p1rs138295_R1 | TTACCATCTCCAGGACTATCG  | 138164-138460   | 297                                        | GBA0_pX01.0157      | <i>gepX4</i> | spore germination protein xa                             |
| C8   | pX01       | 139826     | 59_BA_p1rs139826_F1 | AGCAAAAGACAAATATGATG   | 59_BA_p1rs139826_R1 | TCCTCACCCTTTCCAAATTA   | 139723-139974   | 252                                        | GBA0_pX01.0158      | <i>gepX3</i> | spore germination protein xc, (pX01-112)                 |
| D8   | pX01       | 144759     | 60_BA_p1rs144759_F1 | AGACAGGATGTAADAGATGA   | 60_BA_p1rs144759_R1 | TTTCCGCCAGTCTTCTTCC    | 144585-144910   | 326                                        | GBA0_pX01.0164      | <i>pagA</i>  | protective antigen                                       |
| E8   | pX01       | 149661     | 61_BA_p1rs149661_F1 | GTCTTCCCAAGGATTAATAT   | 61_BA_p1rs149661_R1 | GTTTTACCGCATTAATCTCTCC | 149496-149800   | 305                                        | GBA0_pX01.0172      | <i>lef</i>   | lethal factor                                            |
| F8   | pX01       | 150234     | 62_BA_p1rs150234_F1 | AGCTCGTAAAGGATATAAGA   | 62_BA_p1rs150234_R1 | CGCATCTACTCCAGTGTATC   | 150112-150400   | 289                                        | GBA0_pX01.0188-0191 | -            | noncoding region                                         |
| G8   | pX01       | 180878     | 63_BA_p1rs180878_F1 | CTCTTGGCATATGCTACTATCA | 63_BA_p1rs180878_R1 | GCCAATATGCTCCACTACTCA  | 180753-181061   | 309                                        | GBA0_pX01.0217      | -            | hypothetical protein                                     |
| H8   | pX02       | 1546       | 64_BA_p2rs1546_F1   | AGCCATCCACCACCTACT     | 64_BA_p2rs1546_R1   | CGAAAGCATACCAAGTGTCT   | 1431-1702       | 272                                        | GBA0_pX02.0002-0003 | -            | noncoding region                                         |
| A9   | pX02       | 2916       | 65_BA_p2rs2916_F1   | CGTTAACCTTGGCTGATTT    | 65_BA_p2rs2916_R1   | ATCCATGDAACGATGATAGA   | 2677-2971       | 295                                        | GBA0_pX02.0005      | -            | hypothetical protein                                     |
| B9   | pX02       | 4050       | 66_BA_p2rs4050_F1   | AGGACATCGTTGATCTACAA   | 66_BA_p2rs4050_R1   | GTGTGACGAAATAATAAAAGC  | 3916-4210       | 295                                        | GBA0_pX02.0007      | -            | ribp90 family protein, (pX02-08)                         |
| C9   | pX02       | 9741       | 67_BA_p2rs9741_F1   | CGCCTTTGGCGATTTCTTT    | 67_BA_p2rs9741_R1   | GGGTTAAATTAACGAGTCTAC  | 9567-9938       | 372                                        | GBA0_pX02.0013      | -            | membrane protein, putative, (pX02-14)                    |
| D9   | pX02       | 14993      | 68_BA_p2rs14993_F1  | GCTCTCTGCTGCTAAGT      | 68_BA_p2rs14993_R1  | TGAAGAAATGCAATGATGATA  | 14817-15170     | 354                                        | GBA0_pX02.0016      | -            | hypothetical protein                                     |
| E9   | pX02       | 18983      | 69_BA_p2rs18983_F1  | AGCAGCTTTCCGCTGATGTT   | 69_BA_p2rs18983_R1  | GTTGAGGATGCTCCCTGAAA   | 18833-19084     | 252                                        | GBA0_pX02.0023      | -            | type IIIV secretion system protein, (pX02-25)            |
| F9   | pX02       | 22433      | 70_BA_p2rs22433_F1  | TACACAGTAAAGCGCAAGC    | 70_BA_p2rs22433_R1  | CGCAAGAAATGATGATAGA    | 22290-22566     | 277                                        | GBA0_pX02.0028      | -            | hypothetical protein                                     |
| G9   | pX02       | 23320      | 71_BA_p2rs23320_F1  | CTCGAATTTCCCATATTTTC   | 71_BA_p2rs23320_R1  | TAAATGTTCACTGCTTACTG   | 23182-23470     | 286                                        | GBA0_pX02.0028      | -            | hypothetical protein                                     |
| H9   | pX02       | 25290      | 72_BA_p2rs25290_F1  | AGGATGGTAAAGTACTG      |                     |                        |                 |                                            |                     |              |                                                          |
